# Supplementary material
Source: HighWire-hosted journal article supplement (http://cmajopen.ca/highwire/filestream/80859/field_highwire_adjunct_files/0/open-2015-0132-original-submission.pdf)
Supplement: open-2015-0132-original-submission.pdf [file open-2015-0132-original-submission.pdf]

1  
2  
3  
4  
5  
6 Gestational weight gain is often excessive and early in pregnancy  
7  
8  
9

10 \*Jarman M<sup>1</sup>, PhD, \*Yuan Y<sup>2</sup>, PhD, Pakseresht M<sup>1</sup>, MD PhD, Shi Q<sup>2</sup>, MSc, Robson PJ<sup>1,3</sup>, PhD,  
11

12 Bell RC<sup>1</sup>, PhD, the APrON Study Team, the ENRICH Team  
13  
14

15 <sup>1</sup> Department of Agricultural, Food and Nutritional Sciences, Division of Human Nutrition,  
16

17 University of Alberta, Edmonton AB  
18

19 <sup>2</sup> School of Public Health, University of Alberta, Edmonton AB  
20

21 <sup>3</sup> Cancer Measurement, Outcomes, Research and Evaluation (COMORE), Cancer Control Alberta,  
22

23 Alberta Health Services  
24

25 \*Jarman and Yuan share joint first authorship as they both contributed equally to this  
26

27 manuscript.  
28  
29

30  
31  
32  
33 Corresponding Author:  
34

35 Rhonda C. Bell, PhD  
36

37 Professor  
38

39 Division of Human Nutrition, Dept of Agricultural, Food and Nutritional Science  
40

41 40126B Li Ka Shing Centre for Health Innovation  
42

43 University of Alberta  
44

45 Edmonton, Alberta  
46

47 T6G 2E1  
48

49 Word Count: 323  
50  
51  
52

53  
54  
55  
56  
57  
58  
59

---

2015/03/25

For Peer Review Only

1  
2  
3 1 Abstract  
4

5 2 Background: Gestational weight gain (GWG) in excess or below Health Canada's guidelines is  
6  
7 3 known to increase the risk of adverse outcomes for mother and baby. This study describes  
8  
9 4 patterns and trajectories of total and rates of GWG in a large prospective cohort of pregnant  
10  
11 5 women from Alberta.  
12

13 6 Methods: Body weight and height data was collected from 1541 pregnant women (>16 years,  
14  
15 7 literate in English, <27 weeks gestation) during 2 – 3 study visits. Women were categorized  
16  
17 8 according to their pre-pregnancy body mass index (BMI; underweight, normal, overweight,  
18  
19 9 obese). Distributions of total and weekly rates of weight gain were calculated and trajectories of  
20  
21 10 weight gain were determined for each pre-pregnancy BMI category.  
22  
23  
24

25 11 Results: Half of the women in this study exceeded GWG guidelines; 18% gained less than  
26  
27 12 recommended. For those with an overweight or obese pre-pregnancy BMI, 19% and 24%  
28  
29 13 exceeded the upper guideline limits by 50l □kg while 16% and 18% exceeded upper limits by  
30  
31 14 >1 □kg, respectively. Approximately one third of overweight and obese women gained weight at  
32  
33 15 more than double the recommended rates. Median weight gain for women with normal,  
34  
35 16 overweight or obese pre-pregnancy BMIs exceeded recommended upper ranges by 3 □, 2 □and 18  
36  
37 17 weeks respectively.  
38

39  
40  
41 Interpretation: Comprehensive information on patterns of GWG in Canadian women will help  
42  
43 to guide the development of effective clinical interventions. Messages and supports that are  
44  
45 tailored for women in different pre-pregnancy BMI categories may help to improve guideline  
46  
47 concordant GWG. Further research is needed to identify best practices and implementation  
48  
49 strategies in the Canadian context.  
50  
51  
52  
53  
54

55 18  
56  
57  
58  
59  
60

1  
2  
3  
4 19 Introduction  
5

6 20 Inadequate or excessive weight gain during pregnancy increases risk of adverse outcomes for  
7  
8 21 mother and baby. Gaining too little weight has been associated with higher risk of infant death<sup>1</sup>  
9  
10 22 and being small for gestational age.<sup>2</sup> Gaining too much weight increases the risk of postpartum  
11  
12 23 weight retention<sup>3</sup> and caesarian delivery<sup>4</sup>, and may also increase the risk of gestational  
13  
14 24 hypertension in mothers<sup>4</sup>, and large for gestational age infants.<sup>5</sup>  
15  
16 25 In 2014, Health Canada adopted and disseminated the updated guidelines for gestational weight  
17  
18 26 gain (GWG) that had been developed by the Institute of Medicine (see Box 1).<sup>6,7</sup> These  
19  
20 27 guidelines are intended to support physicians and clinicians who practice in the area of prenatal  
21  
22 28 care by providing appropriate ranges for total and weekly rates of GWG, based on women's pre-  
23  
24 29 pregnancy body mass index (BMI).  
25  
26 30 The impetus for revising the guidelines was growing recognition that excessive weight gain in  
27  
28 31 pregnancy is becoming increasingly prevalent. Typically, women in developed countries who  
29  
30 32 gain too much weight are likely to have entered pregnancy with a BMI that classifies them as  
31  
32 33 overweight or obese.<sup>8,9</sup> However, more recent studies have demonstrated that excessive GWG  
33  
34 34 is also prevalent in women with a normal pre-pregnancy BMI and it also occurs in underweight  
35  
36 35 women, albeit to a lesser extent.<sup>4,12,13</sup> To date, the majority of studies in this area have focused  
37  
38 36 on total GWG, with little consideration given to the trajectory of weight gain during the course  
39  
40 37 of pregnancy. Furthermore, many studies have simply classified women into three categories of  
41  
42 38 'below', 'met' or 'above' guidelines, and few have described the distribution of weight gain  
43  
44 39 within groups of women according to pre-pregnancy BMI category. It is clear that more  
45  
46 40 comprehensive information on patterns of GWG is needed in order to help identify women who  
47  
48  
49  
50  
51  
52  
53  
54  
55  
56  
57  
58  
59  
60

1  
2  
3  
4 41 may be at risk of not meeting GWG guidelines, and to guide the development of more effective  
5  
6 42 strategies for intervention.

7  
8 43 The objective of the current study was to describe patterns of total and rate of GWG in a cohort  
9  
10 44 of pregnant women in Alberta, Canada relative to Health Canada's revised GWG guidelines.

#### 11 12 45 Methods

##### 13 14 46 Study design and population

15  
16  
17 47 The Alberta Pregnancy Outcomes and Nutrition (APrON) study is a prospective cohort study of  
18  
19  
20 48 women during pregnancy and postpartum and their infants. Details of participant recruitment and  
21  
22 49 study protocols have been published elsewhere.<sup>14,15</sup> In brief, participants were recruited through  
23  
24  
25 50 advertisements in the media and in physician offices in Calgary and Edmonton, Alberta between  
26  
27 51 May 2009 and November 2012. Eligibility criteria were: aged 16 years or older, literate in  
28  
29 52 English and <27 weeks gestation. Women who provided written informed consent were invited  
30  
31  
32 53 to attend a study centre once in each trimester following enrollment, and once at approximately  
33  
34 54 three months postpartum. Ethical approval for the APrON study was obtained from the Health  
35  
36 55 Research Ethics Boards at the University of Alberta and the University of Calgary.

##### 37 38 56 Procedure

39  
40  
41 57 Upon enrollment, participants completed questionnaires concerning pre-pregnancy weight, age,  
42  
43 58 parity, marital status, ethnicity, family income, and education. At each study centre visit, trained  
44  
45 59 staff measured participant weight to the nearest 0.1 kg (Healthometer Professional 752KL), and  
46  
47 60 height to the nearest 1 cm (Charder HM200P Portstad Portable Stadiometer). Pre-pregnancy  
48  
49 61 BMI was calculated using self-reported pre-pregnancy weight and measured height and women  
50  
51 62 were classified as underweight (BMI < 18.5 kg/m<sup>2</sup>), normal weight (18.5 ≤ BMI < 25 kg/m<sup>2</sup>),  
52  
53  
54  
55  
56  
57  
58  
59  
60

1  
2  
3  
4 63 overweight ( $25 < \text{BMI} < 30 \text{ kg/m}^2$ ), or obese ( $\geq 30 \text{ kg/m}^2$ ). Self-reported highest weight in pregnancy  
5  
6 64 was recorded at the postpartum visit.

7  
8 65 **Outcome measures**

9  
10 66 Weight change throughout pregnancy was calculated as the difference between self-reported pre-  
11  
12 67 pregnancy body weight and measured weight at each study centre visit. Total GWG was  
13  
14 68 calculated by subtracting pre-pregnancy body weight from the highest body weight during  
15  
16 69 pregnancy. In cases where participants either did not report their highest body weight or reported  
17  
18 70 a weight that was lower than had been measured during the 3rd trimester, we calculated total  
19  
20 71 GWG using measured weight in the 3rd trimester. Weekly average weight gain during the 2nd  
21  
22 72 and 3rd trimesters was calculated by subtracting measured weight in the 2nd trimester from  
23  
24 73 measured weight in the 3rd trimester, and dividing by the number of intervening weeks.  
25  
26 74 Participants with missing values for either 2nd or 3rd trimester measured weight were excluded  
27  
28 75 from this weight gain rate analysis.

29  
30 76 **Statistical analysis**

31  
32 77 Within each pre-pregnancy BMI group, women were categorized as “below” if they gained less  
33  
34 78 than the lower limit of the recommended amount of total weight, “met” if they gained within the  
35  
36 79 recommended weight range, or “above” if they exceeded the upper limit of the recommended  
37  
38 80 amount of weight gain. Information from the infants birth record was used to classify infants as  
39  
40 81 small for gestational age (SGA) or large for gestational age (LGA). SGA is defined as being  $< 10^{\text{th}}$   
41  
42 82 percentile for gestational age and LGA is defined as being  $> 90^{\text{th}}$  percentile for gestational age.  
43  
44 83 The association between SGA and LGA and GWG guideline adherence were assessed using a  $\chi^2$   
45  
46 84 test.  
47  
48  
49  
50  
51  
52  
53  
54  
55  
56  
57  
58  
59  
60

1  
2  
3  
4 85 Women were also categorized as “below”, “met”, or “above” according to their adherence to  
5  
6 86 guidelines for average weekly rate of weight gain during the 2nd and 3rd trimesters. The  
7  
8 87 distributions of total and weekly rate of GWG by pre0pregnancy BMI category, as well as  
9  
10 88 proportions of women who were  $50 < 1 \square \text{kg}$ ,  $1 \square 0 15 \text{ kg}$  and  $> 15 \text{ kg}$  over the upper recommended  
11  
12 89 limit for their pre0pregnancy BMI category were calculated. Box plots were used to explore the  
13  
14 90 trajectory of weight gain throughout pregnancy, with each box indicating the median and  
15  
16 91 interquartile range of weight gain within the range of gestational ages. Cut0ff points for  
17  
18 92 gestational age were selected such that the range of time for each box was as small as possible  
19  
20 93 but had a minimum of 16 observations per box. The guideline ranges were superimposed on to  
21  
22 94 each box plot to facilitate comparisons between observed and recommended GWG trajectories.  
23  
24  
25  
26  
27 95 Results  
28  
29 96 In total, 2189 pregnant women were recruited to the APrON study. The median GA at the time  
30  
31 97 of enrollment was 16.6 weeks (IQR: 1402 16 weeks). Those included in our analyses (n=1541)  
32  
33 98 gave birth to a single, live, full term ( $\geq 37$  weeks gestation) infant and had complete data for  
34  
35 99 GWG and pre0pregnancy weight status (Figure 1). Participants excluded from these analyses did  
36  
37 100 not differ in socio0demographic and health0related characteristics from those who were included  
38  
39 101 (data not shown).  
40  
41  
42  
43 102 Sensitivity analyses were undertaken to explore the utility of using self0reported pre0pregnancy  
44  
45 103 weight to calculate BMI. BMI derived from height and weight measured in 528 participants  
46  
47 104 recruited during the first trimester was compared with BMI derived for the same women using  
48  
49 105 measured height and self0reported pre0pregnancy weight. Almost all (99%) women categorized  
50  
51 106 as obese using measured values were placed in the same category when self0reported weights  
52  
53  
54  
55  
56  
57  
58  
59  
60

1  
2  
3  
4 107 were used to derive BMI. Classification into normal and overweight categories using self0  
5  
6 108 reported vs measured values was accurate in approximately 86% of women.  
7  
8 109 The women included in these analyses were predominantly Caucasian (81%), had a partner at the  
9  
10 110 time of study enrolment (96%), and had completed tertiary education (69%). Just over half were  
11  
12 111 pregnant with their first child (Table 1). Approximately three quarters of women were enrolled  
13  
14 112 in their 2nd trimester, and 86% of women came to all scheduled pre and postpartum visits. Pre0  
15  
16 113 pregnancy BMI varied; almost two thirds were of normal BMI, 4% were underweight, 21% were  
17  
18 114 overweight and 1% were obese.  
19  
20  
21 115 In this group of 1541 women, 761 (49%) exceeded Health Canada's guidelines for total GWG,  
22  
23 116 while 272 (18%) gained less weight than recommended. Approximately 7% of women who  
24  
25 117 were categorized as overweight or obese when entering pregnancy exceeded the guidelines,  
26  
27 118 while 28% and 4% of underweight and normal weight women exceeded the guidelines. Weight  
28  
29 119 gain lower than recommended was observed in 17% of underweight women, 22% of normal  
30  
31 120 weight women, and 6% and 14% of overweight and obese women respectively. There was some  
32  
33 121 evidence of weight loss, particularly in women who had entered pregnancy with a BMI that  
34  
35 122 categorized them as obese.  
36  
37  
38 123 Within each prepregnancy BMI category, there was wide variation in total GWG (Figure 2). In  
39  
40 124 the under0and normal weight groups, 9% and 1% exceeded the upper guideline limit by 50<1  
41  
42 125 kg, while 3% exceeded by at least 1 kg in both groups. In the overweight and obese categories,  
43  
44 126 19% and 24% of women, respectively, exceeded the upper guideline limit by 50l kg. Gains  
45  
46 127 between >1 and <15 kg over the upper limit were observed in approximately 12% in each of the  
47  
48 128 two groups while gains >15 kg above the upper limit were observed in 4% and 5% of women in  
49  
50  
51 129 the overweight and obese categories respectively. The proportions of SGA infants of women  
52  
53  
54  
55  
56  
57  
58

1  
2  
3  
4 130 who were in the under, met and above GWG categories were 16.2%, 9.5% and 7.4%,  
5  
6 131 respectively ( $P = 0.004$ ). The proportions of LGA infants of women who were in the under, met  
7  
8 132 and above GWG categories were 2.5%, 3.8%, 9.9%, respectively ( $P < 0.001$ ).

9  
10 133 The proportions of women who exceeded the recommended average weekly rate of GWG in the  
11  
12 134 2nd and 3rd trimesters were higher in the overweight (88%) and obese (80%) groups than in the  
13  
14 135 normal (60%) and underweight (35%) groups (Figure 3). The proportions of women who gained  
15  
16 136 weight at a rate that was more than double the upper recommended limits were 3%, 30% and  
17  
18 137 40% of normal, overweight and obese women respectively.

19  
20 138 For normal weight and overweight groups, median weight gain exceeded the upper range of their  
21  
22 139 respective guideline by approximately 30 weeks and 20 weeks of gestation respectively (Figure  
23  
24 140 4). Over half of the women in the obese group had gained more weight than the recommended  
25  
26 141 upper range by 18 weeks of gestation. In all BMI groups, weight gain continued to rise until the  
27  
28 142 end of pregnancy.

## 29 143 Discussion

### 30 144 Main findings

31  
32 145 In this group of women from Alberta, Canada, adherence to Health Canada's revised GWG  
33  
34 146 guidelines was low. Excess GWG was most marked among women with pre-pregnancy BMIs in  
35  
36 147 the overweight and obese categories, although 40% of those who entered pregnancy with a  
37  
38 148 normal BMI also experienced excessive GWG. **Women varied** in the extent to which ~~women~~  
39  
40 149 they exceeded the guidelines with 16% of those overweight or obese pre-pregnancy exceeding  
41  
42 150 their respective guidelines by more than 10 kg. **In addition**, GWG trajectories for women in the  
43  
44 151 overweight and normal weight categories were very similar. The extent to which these  
45  
46 152 similarities reflect physiological effects, psychosocial/behavioural effects or a combination of



1  
2  
3  
4 153 these should be topics for future research. Finally, we observed that over half of women in the  
5  
6 154 overweight or obese group exceeded their respective guidelines by ~ 2 weeks gestation.

#### 7 8 155 Explanation and comparison with other studies

9  
10 156 Our estimates are broadly consistent with those reported by recent studies in the USA and other  
11  
12 157 Western countries where GWG is measured routinely<sup>4,12,16018</sup> and highlights the universality of  
13  
14 158 this issue across many countries and health care systems. Of note are the findings from a very  
15  
16 159 recent study of GWG in normal weight women with low risk pregnancies, across seven countries  
17  
18 160 worldwide, in which the average GWG was 13.7 kg, which is consistent with our results and the  
19  
20 161 IOM recommendations.<sup>19</sup>

21  
22 162 The magnitude of excessive weight gain and the fact that 4% of women in the obese category  
23  
24 163 appeared to lose weight, suggests that weight management in pregnancy is a challenging and  
25  
26 164 complex issue for women and healthcare providers to address.<sup>20</sup> Women who gained in excess  
27  
28 165 of the guidelines were more likely to have a LGA baby which corroborates findings from other  
29  
30 166 research.<sup>21024</sup> LGA pregnancies are more likely to result in delivery complications including:  
31  
32 167 cesarean section, neonatal hypoglycemia or shoulder dystocia,<sup>25</sup> in addition to increased risk of  
33  
34 168 overweight in childhood.<sup>26028</sup> Similarly, we also observed that relatively high proportions of  
35  
36 169 underweight and normal weight women gained less weight than recommended and this was  
37  
38 170 associated with increased risk of an SGA infant. It is not known if the risks or the consequences  
39  
40 171 of inadequate weight gain during pregnancy differ by prepregnancy BMI. It is possible that  
41  
42 172 there were clinical explanations for some of the excessive or inadequate GWG observed in this  
43  
44 173 study; however as an observational study it was not an objective to explore clinical  
45  
46 174 underpinnings and more research in this area is warranted.

1  
2  
3  
4 175 Approximately one third of women with a pre-pregnancy BMI in the overweight or obese  
5  
6 176 categories had an average weekly rate of GWG in the 2nd and 3rd trimesters that was more than  
7  
8 177 double the upper limit of the recommended rates. Rapid rates of weight gain are well  
9  
10 178 documented during the 2nd to 3rd trimesters<sup>29,30</sup>, although factors contributing to the markedly  
11  
12 179 high rates observed in our study are not well understood. The fact that the majority of women in  
13  
14 180 the normal, overweight and obese categories exceeded the recommended weekly rates of weight  
15  
16 181 gain suggests that rapid weight gain is not well-attended to by health care providers or women  
17  
18 182 during this phase of pregnancy.  
19  
20  
21 183 Historically, a sigmoidal the pattern of GWG that has been most commonly described is  
22  
23 184 sigmoidal, accelerating between the 2<sup>nd</sup> and 3<sup>rd</sup> trimesters and plateauing in late pregnancy<sup>6,31</sup> as  
24  
25 185 fetal growth slows slowing in the final weeks of gestation.<sup>32</sup> More recent evidence, including  
26  
27 186 from our own study, suggests that maternal weight in many women may continue to increase up  
28  
29 187 until delivery.<sup>33,34</sup> High rates of GWG in the 2<sup>nd</sup> and 3<sup>rd</sup> trimester have been associated with  
30  
31 188 larger gains in maternal fat mass, higher birth weight and longer birth length.<sup>35,36</sup>

### 36 189 Limitations

37  
38  
39 190 A limitation of our study was that pre-pregnancy BMI was calculated using self-reported pre-  
40  
41 191 pregnancy weight; however, further analyses suggested that the data were reasonable. BMI was  
42  
43 192 calculated using measured height and weight for 528 participants who were recruited during the  
44  
45 193 first trimester, where weight gain should be minimal. The accuracy of BMI using self-reported  
46  
47 194 pre-pregnancy weights was 99% in the obese category and 86% in each of the normal and  
48  
49 195 overweight categories. For the latter 2 categories, over 10% in each group belonged to the  
50  
51 196 next higher weight category. The self-reported underweight group had the lowest accuracy  
52  
53 197 (71%). Self-reported highest weight during pregnancy was missing in 307 women and for these

1  
2  
3  
4 198 women their measured weight in the third trimester was used as a substitute. Sensitivity analysis  
5  
6 199 and simulation studies were carried out to investigate the implications of these procedures. [Since](#)  
7  
8 200 the proportion of those who exceeded both total and rate of weight gain increased in all pre0  
9  
10 201 pregnancy BMI categories the results reported in our study appear to be conservative estimates  
11  
12 202 of the true proportions of excessive GWG.  
13  
14  
15 203 Compared women of childbearing age in a representative nationwide survey of Canadians <sup>37</sup>, a  
16  
17 204 greater proportion of women in our study had higher levels of education and household income.  
18  
19 205 As APrON is a prospective cohort study it was not designed to be representative of all Canadian  
20  
21 206 women of childbearing age. Research has shown that higher education is associated with better  
22  
23 207 GWG guideline adherence <sup>38</sup>, it is likely that GWG adherence in the general Canadian  
24  
25 208 population of childbearing women is worse than what we reported here.  
26  
27  
28

### 29 209 Conclusions

30  
31 210 Overall, our findings in this group of highly educated women suggest that weight management in  
32  
33 211 pregnancy is challenging and complex, and that the scope of the issue is likely to be much larger  
34  
35 212 than reported here. Nonetheless, these observations reinforce Health Canada's recommendations<sup>7</sup>  
36  
37 213 that GWG should be discussed with all pregnant women, irrespective of prepregnancy BMI  
38  
39 214 category, and that messages may need to be tailored for women in different prepregnancy BMI  
40  
41 215 categories. Our observations also suggest that these conversations need to be held early in  
42  
43 216 pregnancy, at a time when it is more feasible to provide support that may mitigate the risk of  
44  
45 217 excessive or inadequate weight gain. Consideration of the average weekly rate of GWG may be  
46  
47 218 particularly important for healthcare providers. Rate of GWG reflects a woman's likely  
48  
49 219 trajectory of total GWG and may provide a tool to identify and provide additional support for  
50  
51  
52  
53  
54  
55  
56  
57  
58  
59  
60

1  
2  
3  
4  
5  
6  
7  
8  
9  
10  
11  
12  
13  
14  
15  
16  
17  
18  
19  
20  
21  
22  
23  
24  
25  
26  
27  
28  
29  
30  
31  
32  
33  
34  
35  
36  
37  
38  
39  
40  
41  
42  
43  
44  
45  
46  
47  
48  
49  
50  
51  
52  
53  
54  
55  
56  
57  
58  
59  
60

220 women at risk of not meeting the GWG guidelines. More research is needed to explore how to  
221 address the issue of GWG, particularly in the context of the Canadian healthcare system.  
222

Confidential

1  
2  
3  
4 223 Acknowledgements

5 224 The authors would like to acknowledge Dr. Fatheema Begum, Sarah Loehr, Anne Gilbert, Ala

6 225 Qabaja, Andrea Deane, and Lubna Anis for their assistance with data collection and database

7  
8 226 development. We are sincerely grateful to all APrON participants and study team members.

9  
10  
11 227 APrON was funded by Alberta Innovates Health Solutions. Analyses reported in this manuscript

12  
13 228 were also funded by Alberta Innovates Health Solutions through a Collaborative Research

14  
15  
16 229 Innovation Opportunities Program Grant awarded to the Bell, Robson and the ENRICH study

17  
18 230 team.  
19  
20  
21  
22  
23  
24  
25  
26  
27  
28  
29  
30  
31  
32  
33  
34  
35  
36  
37  
38  
39  
40  
41  
42  
43  
44  
45  
46  
47  
48  
49  
50  
51  
52  
53  
54  
55  
56  
57  
58  
59  
60

Confidential

1  
2  
3  
4 231 Figure Legends

5  
6 232 Figure 1. Consort diagram for participants in the Alberta Pregnancy Outcomes and Nutrition  
7  
8 233 (APrON) study who were included in the analyses of gestational weight gain.

9  
10 234  
11  
12 235 **Box 1.** Description of the ranges of total and weekly rate of GWG according to Health Canada's  
13  
14 236 recommendations by pre-pregnancy BMI category,

15  
16 237  
17  
18 238 Figure 2. Histograms of total gestational weight gain (kg) by pre-pregnancy BMI category  
19  
20 239 among women in the Alberta Pregnancy Outcomes and Nutrition (APrON) cohort. Total weight  
21  
22 240 gain is shown along the x-axis in 2 kg blocks. The blue ticks on the x-axis indicate the lower and  
23  
24 241 upper range recommended for total weight gain according to Health Canada's gestational weight  
25  
26 242 gain guidelines and within the indicated pre-pregnancy body mass index category. The y-axis  
27  
28 243 shows the proportion of women who gained that amount of total weight in pregnancy.

29  
30 244  
31  
32 245 Figure 3. Histograms of the weekly rate of gestational weight gain (kg/week) between the 2<sup>nd</sup>  
33  
34 246 and 3<sup>rd</sup> trimesters of pregnancy by pre-pregnancy BMI category among women in the Alberta  
35  
36 247 Pregnancy Outcomes and Nutrition (APrON) cohort. The rate of weight gain is shown along the  
37  
38 248 x-axis in 5 kg/week blocks. The blue ticks on the x-axis indicate the recommended lower and  
39  
40 249 upper range for weekly rate of weight gain, according to Health Canada's gestational weight gain  
41  
42 250 guidelines and within the indicated pre-pregnancy body mass index category. The y-axis shows  
43  
44 251 the proportion of women with a weekly rate of weight gain indicated.

45  
46  
47  
48  
49  
50  
51  
52  
53 252  
54  
55  
56  
57  
58  
59  
60

1  
2  
3  
4 253 Figure 4. Box plots of the median and interquartile range of weight gained at each measurement  
5  
6 254 time point according to pre0pregnancy body mass index category. Women were included in 2 or  
7  
8 255 3 boxes each according to how many study visits they attended. The purple line and dashed  
9  
10 256 orange lines represent Health Canada’s gestational average and upper and lower ranges for total  
11  
12 257 weight gain for women within the specified pre0pregnancy body mass index category. The green  
13  
14 258 line in the box plots for the overweight and obese women represents Health Canada’s average  
15  
16 259 recommended weight gain for women with a normal pre0pregnancy body mass index. The red  
17  
18 260 dots in each box indicate the median gestational age of women who contributed to that box. The  
19  
20 261 box plot for the underweight pre0pregnancy BMI category underweight is not shown because of  
21  
22 262 the small sample size (n=58).  
23  
24  
25  
26  
27  
28  
29  
30  
31  
32  
33  
34  
35  
36  
37  
38  
39  
40  
41  
42  
43  
44  
45  
46  
47  
48  
49  
50  
51  
52  
53  
54  
55  
56  
57  
58  
59  
60

264 Table 1: Socio-demographic characteristics of women enrolled in the Alberta Pregnancy Outcomes  
 265 and Nutrition (APrON) study according to their pre-pregnancy BMI

| Characteristic<br>n (%)                | Total 1541  | Underweight<br>58 (3.8) | Normal<br>Weight<br>994 (64.5) | Overweight<br>328 (21.3) | Obese<br>161(10.4) | p0value<br>of $\chi^2$ test |
|----------------------------------------|-------------|-------------------------|--------------------------------|--------------------------|--------------------|-----------------------------|
|                                        |             |                         | mean $\pm$ SD                  |                          |                    |                             |
| Pre0pregnancy BMI (kg/m <sup>2</sup> ) | 1541        | 17.7 $\pm$ 0.9          | 21.8 $\pm$ 1.7                 | 27.1 $\pm$ 1.4           | 34.5 $\pm$ 4.2     |                             |
| Height, cm                             | 1541        | 167.2 $\pm$ 6.9         | 165.6 $\pm$ 6.4                | 166.1 $\pm$ 6.2          | 165.0 $\pm$ 7.7    |                             |
| Pre0pregnancy weight, kg               | 1541        | 49.5 $\pm$ 5.1          | 59.9 $\pm$ 6.5                 | 74.8 $\pm$ 7.0           | 94.0 $\pm$ 13.6    |                             |
| Gestational Weight Gain, kg            | 1541        | 16.9 $\pm$ 6.8          | 15.5 $\pm$ 5.3                 | 15.2 $\pm$ 6.0           | 12.3 $\pm$ 7.8     |                             |
| Age, years                             | 1519        | 28.8 $\pm$ 4.1          | 31.2 $\pm$ 4.3                 | 31.8 $\pm$ 4.4           | 31.2 $\pm$ 4.4     |                             |
|                                        |             |                         | n(%)                           |                          |                    |                             |
| Parity                                 |             |                         |                                |                          |                    | $\chi^2$ 77                 |
| 0                                      | 827 (53.6)  | 30 (3.6)                | 563 (68.1)                     | 155 (18.7)               | 79 (9.6)           |                             |
| 1                                      | 539 (35)    | 18 (3.3)                | 333 (61.8)                     | 128 (23.7)               | 60 (11.1)          |                             |
| $\geq$ 2                               | 151 (9.7)   | 5 (3.3)                 | 87 (57.6)                      | 42 (27.8)                | 17 (11.3)          |                             |
| Missing                                | 24 (1.7)    |                         |                                |                          |                    |                             |
| Marital status                         |             |                         |                                |                          |                    | $\chi^2$ 115                |
| Married and Commonlaw                  | 1460 (94.8) | 49 (3.4)                | 948 (64.9)                     | 315 (21.6)               | 148 (10.1)         |                             |
| Divorced, Separated, Single            | 59 (3.8)    | 5 (8.5)                 | 37 (62.7)                      | 9 (15.3)                 | 8 (13.6)           |                             |
| Missing                                | 22 (1.4)    |                         |                                |                          |                    |                             |
| Ethnicity                              |             |                         |                                |                          |                    | $\chi^2$ 2                  |
| Asian                                  | 176 (11.4)  | 8 (4.5)                 | 133 (75.6)                     | 28 (15.9)                | 7 (4)              |                             |
| Caucasian                              | 1241 (80.5) | 38 (3.1)                | 794 (64)                       | 275 (22.2)               | 134 (10.8)         |                             |
| Other*                                 | 94 (6.1)    | 7 (7.4)                 | 54 (57.4)                      | 19 (20.2)                | 14 (14.9)          |                             |
| Missing                                | 30 (2)      |                         |                                |                          |                    |                             |
| Family income, \$ (Cdn)                |             |                         |                                |                          |                    | $\chi^2$ 152                |
| less than \$7000                       | 325 (21.1)  | 16 (4.9)                | 200 (61.5)                     | 68 (20.9)                | 41 (12.6)          |                             |
| \$7000 or more                         | 1178 (76.4) | 36 (3.1)                | 774 (65.7)                     | 253 (21.5)               | 115 (9.8)          |                             |
| Missing                                | 38 (2.4)    |                         |                                |                          |                    |                             |
| Maternal education                     |             |                         |                                |                          |                    | $<$ $\chi^2$ 1              |
| Completed high school diploma or lower | 164 (10.6)  | 9 (5.5)                 | 92 (56.1)                      | 31 (18.9)                | 32 (19.5)          |                             |
| Completed trade, technical             | 286 (18.6)  | 8 (2.8)                 | 162 (56.6)                     | 77 (26.9)                | 39 (13.6)          |                             |
| Completed University                   | 704 (45.7)  | 23 (3.3)                | 465 (66.1)                     | 156 (22.2)               | 60 (8.5)           |                             |
| Completed postgraduate                 | 354 (23)    | 12 (3.4)                | 262 (74)                       | 56 (15.8)                | 24 (6.8)           |                             |
| Missing                                | 33 (2.1)    |                         |                                |                          |                    |                             |

2015/03/25

16



1  
2  
3  
4  
5  
6  
7  
8  
9  
10  
11  
12  
13  
14  
15  
16  
17  
18  
19  
20  
21  
22  
23  
24  
25  
26  
27  
28  
29  
30  
31  
32  
33  
34  
35  
36  
37  
38  
39  
40  
41  
42  
43  
44  
45  
46  
47  
48  
49  
50  
51  
52  
53  
54  
55  
56  
57  
58  
59  
60

266 \*Other includes Arab, Black, Jamaican and Latin American.

267

Confidential

1  
2  
3  
4  
5  
6  
7  
8  
9  
10  
11  
12  
13  
14  
15  
16  
17  
18  
19  
20  
21  
22  
23  
24  
25  
26  
27  
28  
29  
30  
31  
32  
33  
34  
35  
36  
37  
38  
39  
40  
41  
42  
43  
44  
45  
46  
47  
48  
49  
50  
51  
52  
53  
54  
55  
56  
57  
58  
59  
60

268  
269  
270  
271

Figure 1

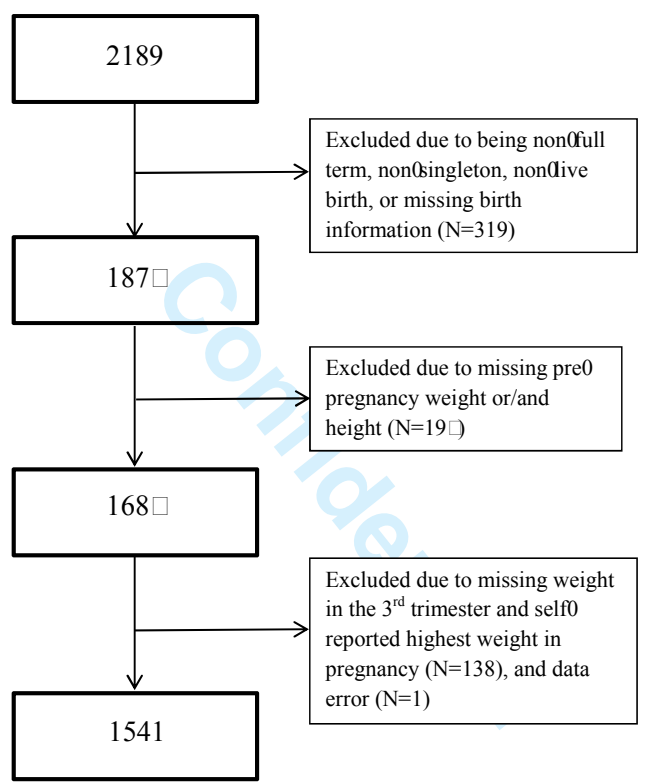

Box 1

| Pre-pregnancy BMI | Total GWG | Rate GWG       |
|-------------------|-----------|----------------|
| Underweight:      | 12.50l8kg | □440□58kg/week |
| Normal weight:    | 11.50l6kg | □350□5kg/week  |
| Overweight:       | 70l1.5kg  | □230□33kg/week |
| Obese:            | 509kg     | □170□27kg/week |

Confidential

Figure 2

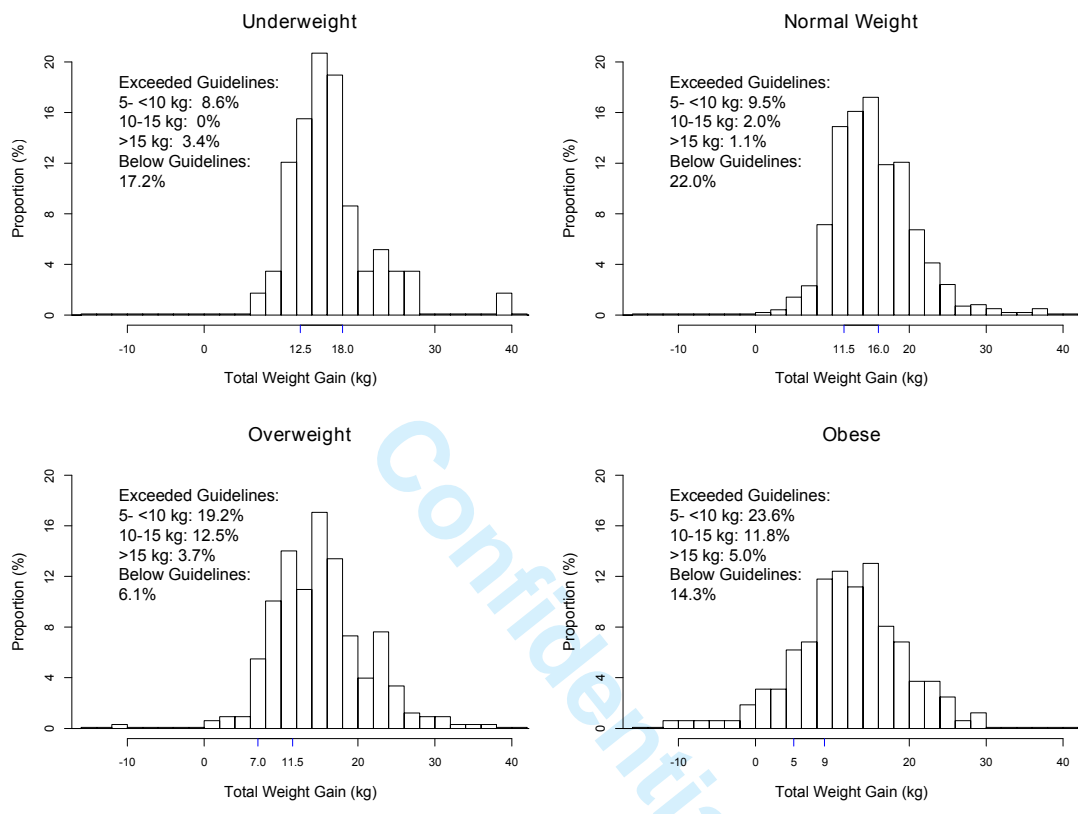

Confidential

Figure 3

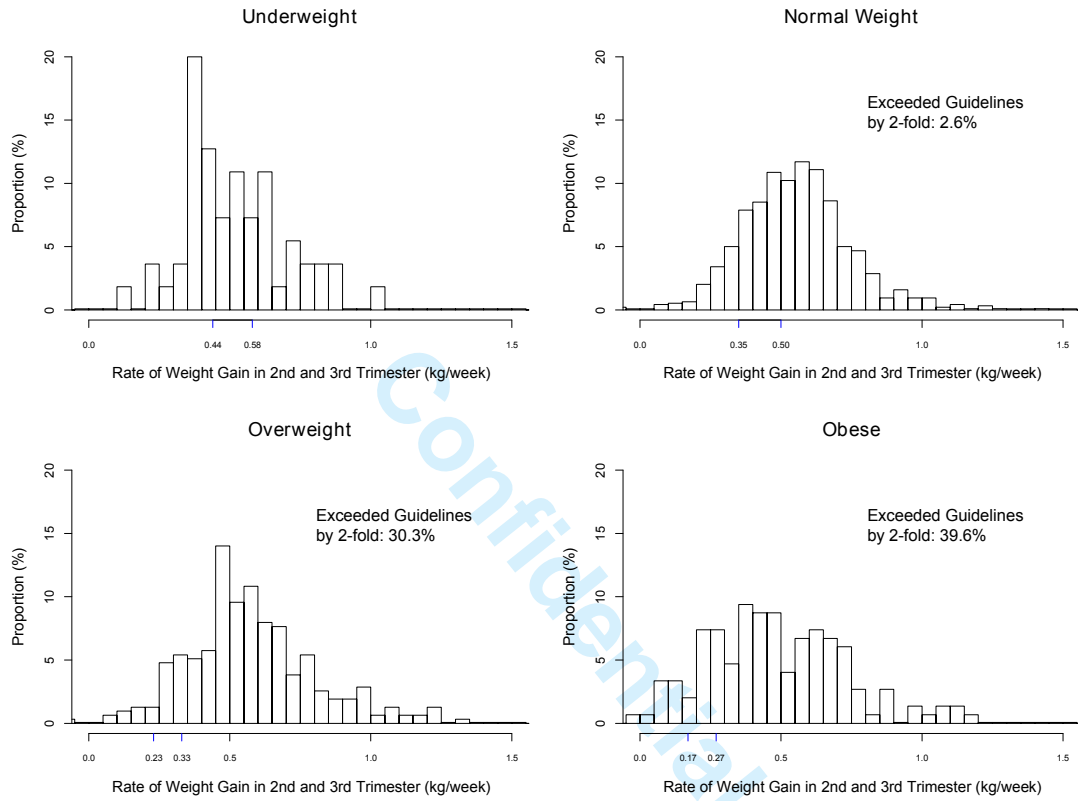

Figure 4

1  
2  
3  
4  
5  
6  
7  
8  
9  
10  
11  
12  
13  
14  
15  
16  
17  
18  
19  
20  
21  
22  
23  
24  
25  
26  
27  
28  
29  
30  
31  
32  
33  
34  
35  
36  
37  
38  
39  
40  
41  
42  
43  
44  
45  
46  
47  
48  
49  
50  
51  
52  
53  
54  
55  
56  
57  
58  
59  
60

Confidential

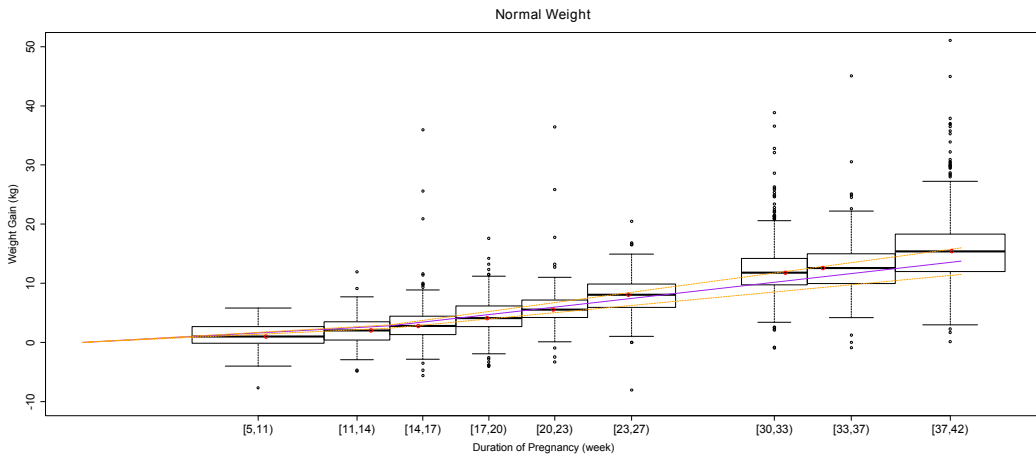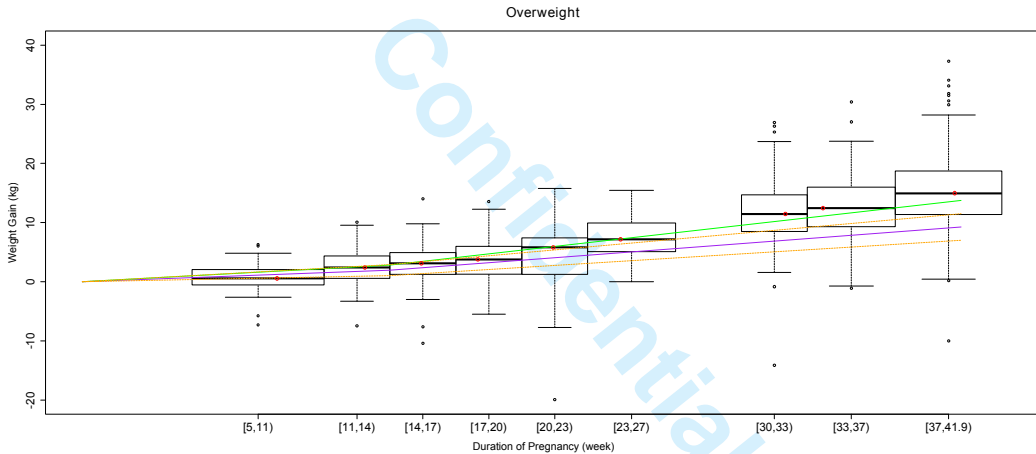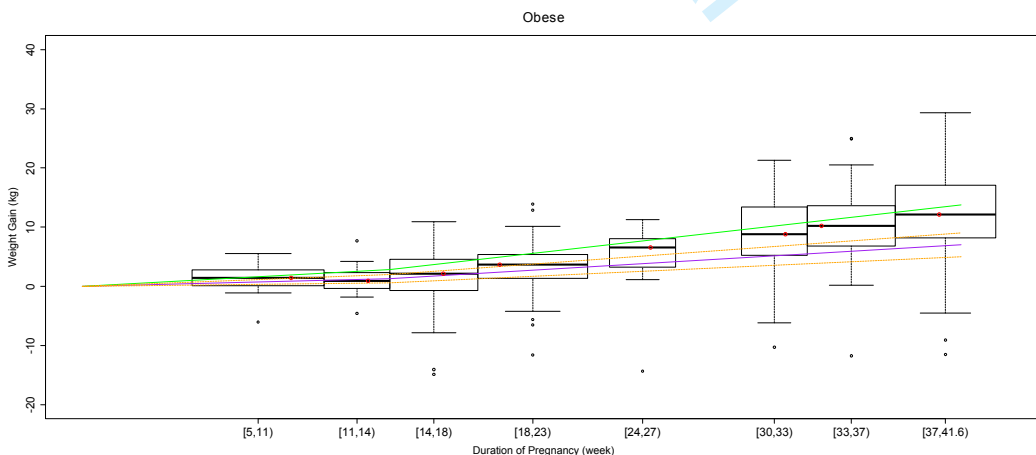

## References

1. Davis RR, Hofferth SL, Shenassa ED. Gestational weight gain and risk of infant death in the United States. *Am J Public Health*. 2014;104 Suppl 1:S90-5.
2. Scotland NE, Cheng WW, Hopkins LM, Caughey AB. Gestational weight gain and adverse neonatal outcome among term infants. *Obstet Gynecol*. 2006;108:635-43.
3. Nehring I, Schmoll S, Beyerlein A, Hauner H, von Kries R. Gestational weight gain and long-term postpartum weight retention: a meta-analysis. *Am J Clin Nutr*. 2011;94:1225-31.
4. Johnson J, Clifton RG, Roberts JM, et al. Pregnancy outcomes with weight gain above or below the 2009 Institute of Medicine guidelines. *Obstet Gynecol*. 2013;121:969-75.
5. Nohr EA, Vaeth M, Baker JL, Sørensen TIA, Olsen J, Rasmussen KM. Combined associations of prepregnancy body mass index and gestational weight gain with the outcome of pregnancy. *American Journal of Clinical Nutrition*. 2008;87:1750-9.
6. Medicine Io. *Weight Gain During Pregnancy: Reexamining the Guidelines*. Washington, DC: National Academies Press; 2009.
7. Canada H. *Prenatal Nutrition Guidelines for Health Professionals: Gestational Weight Gain*. In: Canada H, ed. Ottawa, ON2014.
8. Weisman CS, Hillemeier MM, Downs DS, Chuang CH, Dyer AM. Preconception predictors of weight gain during pregnancy: prospective findings from the Central Pennsylvania Women's Health Study. *Women's health issues : official publication of the Jacobs Institute of Women's Health*. 2010;20:126-32.
9. Melzer K, Schutz Y. Pre-pregnancy and pregnancy predictors of obesity. *Int J Obes (Lond)*. 2010;34 Suppl 2:S44-52.
10. HL, Schultz Y. Weight gain during pregnancy: Adherence to Health Canada's Guidelines. *Health Reports*. 2015;23:31-26.
11. Begum FC, McCargar LJ, Bell RC and the APON Team Gestational weight gain and early postpartum weight retention in a prospective cohort of Albertan women. *JOGC*. 2012;34:637-47.
12. Deputy NP, Sharma AJ, Kim SY, Hinkle SN. Prevalence and characteristics associated with gestational weight gain adequacy. *Obstet Gynecol*. 2015;125:773-81.
13. Liu J, Gallagher AE, Carta CM, Torres ME, Moran R, Wilcox S. Racial differences in gestational weight gain and pregnancy-related hypertension. *Annals of epidemiology*. 2014;24:441-7.
14. Kaplan BJ, Giesbrecht GF, Leung BM, et al. The Alberta Pregnancy Outcomes and Nutrition (APON) cohort study: rationale and methods. *Maternal & Child Nutrition*. 2012; epub ahead of print.
15. Manca DP, O'Beirne M, Lightbody T, et al. The most effective strategy for recruiting a pregnancy cohort: a tale of two cities. *BMC pregnancy and childbirth*. 2013;13:75.
16. Winkvist A, Brantsaeter AL, Brandhagen M, Haugen M, Meltzer HM, Lissner L. Maternal Prepregnant Body Mass Index and Gestational Weight Gain Are Associated with Initiation and Duration of Breastfeeding among Norwegian Mothers. *J Nutr*. 2015;145:1263-70.
17. Dudenhausen JW, Grunebaum A, Kirschner W. Prepregnancy body weight and gestational weight gain-recommendations and reality in the USA and in Germany. *Am J Obstet Gynecol*. 2015;213:591-2.
18. Harris DE, Aboueissa AM, Baugh N, Sarton C, Lichter E. 11-year trends in pregnancy-related health indicators in Maine, 2000-2010. *Journal of pregnancy*. 2014;2014:780626.
19. Cheikh Ismail L, Bishop DC, Pang R, et al. Gestational weight gain standards based on women enrolled in the Fetal Growth Longitudinal Study of the INTERGROWTH-21st Project: a prospective longitudinal cohort study. *BMJ*. 2016;352.
20. Kapadia MZ, Park CK, Beyene J, Giglia L, Maxwell C, McDonald SD. Weight Loss Instead of Weight Gain within the Guidelines in Obese Women during Pregnancy: A Systematic Review and Meta-Analyses of Maternal and Infant Outcomes. *PLoS ONE*. 2015;10:e0132650.



- 1 21. Ferraro ZM, Qiu Q, Gruslin A, Adamo KB. Excessive gestational weight gain and obesity contribute to altered  
2 expression of maternal insulin-like growth factor binding protein-3. *International journal of women's health*.  
3 2013;5:657-65.
- 4 22. Camacho-Buenrostro D, Perez-Molina JJ, Vasquez-Garibay EM, Panduro-Baron JG. The Association between Pre-  
5 Pregnancy Obesity and Weight Gain in Pregnancy, with Growth Deviations in Newborns. *Nutricion hospitalaria*.  
6 2015;32:124-9.
- 7 23. Kim SY, Sharma AJ, Sappenfield W, Wilson HG, Salihu HM. Association of Maternal Body Mass Index, Excessive  
8 Weight Gain, and Gestational Diabetes Mellitus With Large-for-Gestational-Age Births. *Obstetrics and  
9 gynecology*. 2014;123:737-44.
- 10 24. Black MH, Sacks DA, Xiang AH, Lawrence JM. The Relative Contribution of Prepregnancy Overweight and  
11 Obesity, Gestational Weight Gain, and IADPSG-Defined Gestational Diabetes Mellitus to Fetal Overgrowth.  
12 *Diabetes Care*. 2013;36:56-62.
- 13 25. Weissmann-Brenner A, Smchen MJ, Zilberberg E, et al. Maternal and neonatal outcomes of large for gestational  
14 age pregnancies. *Acta Obstetrica et Gynecologica Scandinavica*. 2012;91:844-9.
- 15 26. Dietz W. How to tackle the problem early? The role of education in the prevention of obesity. *International  
16 journal of obesity and related metabolic disorders : journal of the International Association for the Study of  
17 Obesity*. 1999;23 Suppl 4:S7-9.
- 18 27. Dietz WH, Nelson A. Barriers to the treatment of childhood obesity: a call to action. *The Journal of pediatrics*.  
19 1999;134:535-6.
- 20 28. Boney CM, Verma A, Tucker R, Vohr BR. Metabolic syndrome in childhood: association with birth weight,  
21 maternal obesity, and gestational diabetes mellitus. *Pediatrics*. 2005;115:e290-e6.
- 22 29. Hinkle SN, Johns AM, Albert PS, Kim S, Grantz KL. Longitudinal changes in gestational weight gain and the  
23 association with intrauterine fetal growth. *European journal of obstetrics, gynecology, and reproductive biology*.  
24 2015;190:41-7.
- 25 30. Walter JR, Perng W, Kleinman KP, Rifas-Shiman SL, Rich-Edwards JW, Oken E. Associations of trimester-specific  
26 gestational weight gain with maternal adiposity and systolic blood pressure at 3 and 7 years postpartum. *Am J  
27 Obstet Gynecol*. 2015;212:499 e1-12.
- 28 31. Hytten F. *Clinical Physiology in Obstetrics*. Oxford: Blackwell Scientific Publications; 1991.
- 29 32. Hytten F. *Weight gain in pregnancy*. Oxford: Blackwell Scientific Publications; 1980.
- 30 33. Carmichael S, Abrams B, Selvin S. The pattern of maternal weight gain in women with good pregnancy  
31 outcomes. *Am J Public Health*. 1997;87:1984-8.
- 32 34. Villamor E, Gofin R, Adler B. Maternal anthropometry and pregnancy outcome among Jerusalem women. *Annals  
33 of human biology*. 1998;25:331-43.
- 34 35. Widen EM, Factor-Litvak PR, Gallagher D, et al. The Pattern of Gestational Weight Gain is Associated with  
35 Changes in Maternal Body Composition and Neonatal Size. *Matern Child Health J* 2015;19:2286-94.
- 36 36. Karachaliou M, Georgiou V, Roumeliotaki T, et al. Association of trimester-specific gestational weight gain with  
37 fetal growth, offspring obesity, and cardiometabolic traits in early childhood. *Am J Obstet Gynecol*. 2015;212:502  
38 e1-14.
- 39 37. Urquia ML, O'Campo PJ, Ray JG. Marital status, duration of cohabitation, and psychosocial well-being among  
40 childbearing women: a canadian nationwide survey. *Am J Public Health*. 2013;103:e8-e15.
- 41 38. Brawarsky P, Stotland NE, Jackson RA, et al. Pre-pregnancy and pregnancy-related factors and the risk of  
42 excessive or inadequate gestational weight gain. *International Journal of Gynecology & Obstetrics*. 2005;91:125-  
43 31.
- 44
- 45
- 46
- 47
- 48
- 49
- 50
- 51
- 52
- 53
- 54
- 55
- 56
- 57
- 58
- 59
- 60

## Appendix 1 – completed STROBE checklist for reporting cohort studies

## STROBE 2007 (v4) Statement—Checklist of items that should be included in reports of cohort studies

| Section/ Topic               | Item # | Recommendation                                                                                                                                                                       | Reported on page # |
|------------------------------|--------|--------------------------------------------------------------------------------------------------------------------------------------------------------------------------------------|--------------------|
| Title and abstract           | 1      | (a) Indicate the study's design with a commonly used term in the title or the abstract                                                                                               | 2                  |
|                              |        | (b) Provide in the abstract an informative and balanced summary of what was done and what was found                                                                                  | 2                  |
| Introduction                 |        |                                                                                                                                                                                      |                    |
| Background/rationale         | 2      | Explain the scientific background and rationale for the investigation being reported                                                                                                 | 3                  |
| Objectives                   | 3      | State specific objectives, including any prespecified hypotheses                                                                                                                     | 4                  |
| Methods                      |        |                                                                                                                                                                                      |                    |
| Study design                 | 4      | Present key elements of study design early in the paper                                                                                                                              | 4                  |
| Setting                      | 5      | Describe the setting, locations, and relevant dates, including periods of recruitment, exposure, follow-up, and data collection                                                      | 4                  |
| Participants                 | 6      | (a) Give the eligibility criteria, and the sources and methods of selection of participants. Describe methods of follow-up                                                           | 4                  |
|                              |        | (b) For matched studies, give matching criteria and number of exposed and unexposed                                                                                                  | NA                 |
| Variables                    | 7      | Clearly define all outcomes, exposures, predictors, potential confounders, and effect modifiers. Give diagnostic criteria, if applicable                                             | 4/5                |
| Data sources/<br>measurement | 8*     | For each variable of interest, give sources of data and details of methods of assessment (measurement). Describe comparability of assessment methods if there is more than one group | 4                  |
| Bias                         | 9      | Describe any efforts to address potential sources of bias                                                                                                                            | 6                  |
| Study size                   | 10     | Explain how the study size was arrived at                                                                                                                                            | 6 and figure 1     |
| Quantitative variables       | 11     | Explain how quantitative variables were handled in the analyses. If applicable, describe which groupings were chosen and why                                                         | 5/6                |

|                     |     |                                                                                                                                                                                                              |                |
|---------------------|-----|--------------------------------------------------------------------------------------------------------------------------------------------------------------------------------------------------------------|----------------|
| Statistical methods | 12  | (a) Describe all statistical methods, including those used to control for confounding                                                                                                                        | 5/6            |
|                     |     | (b) Describe any methods used to examine subgroups and interactions                                                                                                                                          | 5/6            |
|                     |     | (c) Explain how missing data were addressed                                                                                                                                                                  | 5/6            |
|                     |     | (d) If applicable, explain how loss to follow-up was addressed                                                                                                                                               | 5/6            |
|                     |     | (e) Describe any sensitivity analyses                                                                                                                                                                        | 5/6            |
| Results             |     |                                                                                                                                                                                                              |                |
| Participants        | 13* | (a) Report numbers of individuals at each stage of study—eg numbers potentially eligible, examined for eligibility, confirmed eligible, included in the study, completing follow-up, and analysed            | 6 and figure 1 |
|                     |     | (b) Give reasons for non-participation at each stage                                                                                                                                                         | 6 and figure 1 |
|                     |     | (c) Consider use of a flow diagram                                                                                                                                                                           | Figure 1       |
| Descriptive data    | 14* | (a) Give characteristics of study participants (eg demographic, clinical, social) and information on exposures and potential confounders                                                                     | 7 and Table 1  |
|                     |     | (b) Indicate number of participants with missing data for each variable of interest                                                                                                                          | Table 1        |
|                     |     | (c) Summarise follow-up time (eg, average and total amount)                                                                                                                                                  | 7              |
| Outcome data        | 15* | Report numbers of outcome events or summary measures over time                                                                                                                                               | 7/8            |
| Main results        | 16  | (a) Give unadjusted estimates and, if applicable, confounder-adjusted estimates and their precision (eg, 95% confidence interval). Make clear which confounders were adjusted for and why they were included | 8              |
|                     |     | (b) Report category boundaries when continuous variables were categorized                                                                                                                                    | 7 and Box 1    |
|                     |     | (c) If relevant, consider translating estimates of relative risk into absolute risk for a meaningful time period                                                                                             | NA             |
| Other analyses      | 17  | Report other analyses done—eg analyses of subgroups and interactions, and sensitivity analyses                                                                                                               | 7/8            |
| Discussion          |     |                                                                                                                                                                                                              |                |

1  
2  
3  
4  
5  
6  
7  
8  
9  
10  
11  
12  
13  
14  
15  
16  
17  
18  
19  
20  
21  
22  
23  
24  
25  
26  
27  
28  
29  
30  
31  
32  
33  
34  
35  
36  
37  
38  
39  
40  
41  
42  
43  
44  
45  
46  
47  
48  
49

|                   |    |                                                                                                                                                                            |     |
|-------------------|----|----------------------------------------------------------------------------------------------------------------------------------------------------------------------------|-----|
| Key results       | 18 | Summarise key results with reference to study objectives                                                                                                                   | 8/9 |
| Limitations       |    |                                                                                                                                                                            |     |
| Interpretation    | 20 | Give a cautious overall interpretation of results considering objectives, limitations, multiplicity of analyses, results from similar studies, and other relevant evidence | 11  |
| Generalisability  | 21 | Discuss the generalisability (external validity) of the study results                                                                                                      | 11  |
| Other information |    |                                                                                                                                                                            |     |
| Funding           | 22 | Give the source of funding and the role of the funders for the present study and, if applicable, for the original study on which the present article is based              | 13  |

Confidential

\*Give information separately for cases and controls in case-control studies and, if applicable, for exposed and unexposed groups in cohort and cross-sectional studies.
